# Supplementary material
Source: PubMed Central journal article supplement (PMC3725207)
Supplement: NIHMS440883-supplement-01.pdf [file NIHMS440883-supplement-01.pdf]

## Positron Emission Tomography Quantification of Serotonin Transporter in Suicide Attempters with Major Depressive Disorder

### *Supplemental Information*

**Table S1. Raw [<sup>11</sup>C]DASB midbrain binding comparing healthy controls, depressed suicide attempters and depressed non-attempters across multiple possible PET outcome measures.** These values represent raw (unweighted) mean  $\pm$  SD, are not log-transformed, and are not adjusted for age. They therefore do not correspond directly to the analytic and statistical approach employed in the manuscript, but are presented for more direct comparison to other studies that have not employed these approaches.

| Midbrain  | Controls           | MDD<br>non-attempters | MDD<br>attempters  |
|-----------|--------------------|-----------------------|--------------------|
| $V_T/f_p$ | 281.6 $\pm$ 62.95  | 277.97 $\pm$ 76.05    | 238.88 $\pm$ 71.99 |
| $BP_F$    | 189.78 $\pm$ 49.15 | 183.72 $\pm$ 57.86    | 148.8 $\pm$ 60.73  |
| $BP_P$    | 22.2 $\pm$ 7.34    | 19.73 $\pm$ 6.56      | 15.73 $\pm$ 6.15   |
| $BP_{ND}$ | 2.1 $\pm$ 0.47     | 1.94 $\pm$ 0.37       | 1.66 $\pm$ 0.57    |

BP, binding potential;  $f_p$ , plasma free fraction; MDD, major depressive disorder;  $V_T$ , volume of distribution.

**Table S2. Raw [<sup>11</sup>C]DASB binding comparing major depressive disorder (MDD) subjects with healthy controls across multiple possible PET outcome measures.** These values represent raw (unweighted) mean  $\pm$  SD, are not log-transformed, and are not adjusted for age. They therefore do not correspond directly to the analytic and statistical approach employed in the manuscript, but are presented for more direct comparison to other studies that have not employed these approaches.

|                                    | <b>MDD</b>         | <b>Control</b>     |
|------------------------------------|--------------------|--------------------|
| <b>V<sub>T</sub>/f<sub>p</sub></b> |                    |                    |
| Anterior Cingulate                 | 126.7 $\pm$ 30.15  | 129.91 $\pm$ 25.47 |
| Amygdala                           | 200.42 $\pm$ 55.92 | 210.26 $\pm$ 45.33 |
| Dorsal Putamen                     | 198.98 $\pm$ 50.57 | 203.55 $\pm$ 41.81 |
| Hippocampus                        | 132.08 $\pm$ 33.32 | 134.48 $\pm$ 29.11 |
| Midbrain                           | 266.48 $\pm$ 76.31 | 281.6 $\pm$ 62.95  |
| Thalamus                           | 189.89 $\pm$ 47.14 | 192.51 $\pm$ 36.39 |
| <b>BP<sub>F</sub></b>              |                    |                    |
| Anterior Cingulate                 | 33.67 $\pm$ 14.63  | 38.110.97          |
| Amygdala                           | 107.39 $\pm$ 39.94 | 118.45 $\pm$ 29.3  |
| Dorsal Putamen                     | 105.95 $\pm$ 33.93 | 111.74 $\pm$ 24.61 |
| Hippocampus                        | 39.06 $\pm$ 17     | 42.67 $\pm$ 14.08  |
| Midbrain                           | 173.45 $\pm$ 60.28 | 189.78 $\pm$ 49.15 |
| Thalamus                           | 96.86 $\pm$ 31.65  | 100.7 $\pm$ 23.65  |
| <b>BP<sub>p</sub></b>              |                    |                    |
| Anterior Cingulate                 | 3.64 $\pm$ 1.73    | 4.481.66           |
| Amygdala                           | 11.42 $\pm$ 4.28   | 13.8 $\pm$ 4.23    |
| Dorsal Putamen                     | 11.3 $\pm$ 3.55    | 12.93 $\pm$ 3.33   |
| Hippocampus                        | 4.17 $\pm$ 1.89    | 5.01 $\pm$ 1.93    |
| Midbrain                           | 18.55 $\pm$ 6.64   | 22.2 $\pm$ 7.34    |
| Thalamus                           | 10.35 $\pm$ 3.32   | 11.81 $\pm$ 3.88   |
| <b>BP<sub>ND</sub></b>             |                    |                    |
| Anterior Cingulate                 | 0.37 $\pm$ 0.14    | 0.43 $\pm$ 0.14    |
| Amygdala                           | 1.15 $\pm$ 0.32    | 1.3 $\pm$ 0.25     |
| Dorsal Putamen                     | 1.14 $\pm$ 0.26    | 1.23 $\pm$ 0.19    |
| Hippocampus                        | 0.42 $\pm$ 0.15    | 0.47 $\pm$ 0.15    |
| Midbrain                           | 1.86 $\pm$ 0.45    | 2.1 $\pm$ 0.47     |
| Thalamus                           | 1.05 $\pm$ 0.27    | 1.13 $\pm$ 0.29    |
